# Supplementary material for: Bioactivity and hemocompatibility of sol–gel bioactive glass synthesized under different catalytic conditions
Source: Royal Society of Chemistry journal article supplement (doi:10.1039/d0nj02445g), 2020-01-01
Supplement: d0nj02445g1.pdf [file d0nj02445g1.pdf]

## Supplementary Data

### **Bioactivity and Hemocompatibility of Sol-gel bioactive glass synthesized under different catalytic conditions**

D. Durgalakshmi\*<sup>a</sup>, R. Ajay Rakkesh<sup>b</sup>, P. Aruna<sup>a</sup>, S. Ganesan<sup>a</sup> and S. Balakumar<sup>c</sup>

<sup>a</sup> - Department of Medical Physics, Anna University, Chennai, India.

<sup>b</sup> - Centre for Advanced Study in Crystallography and Biophysics, University of Madras, Chennai, India.

<sup>c</sup> - National Centre for Nanoscience and Nanotechnology, University of Madras, Chennai, India.

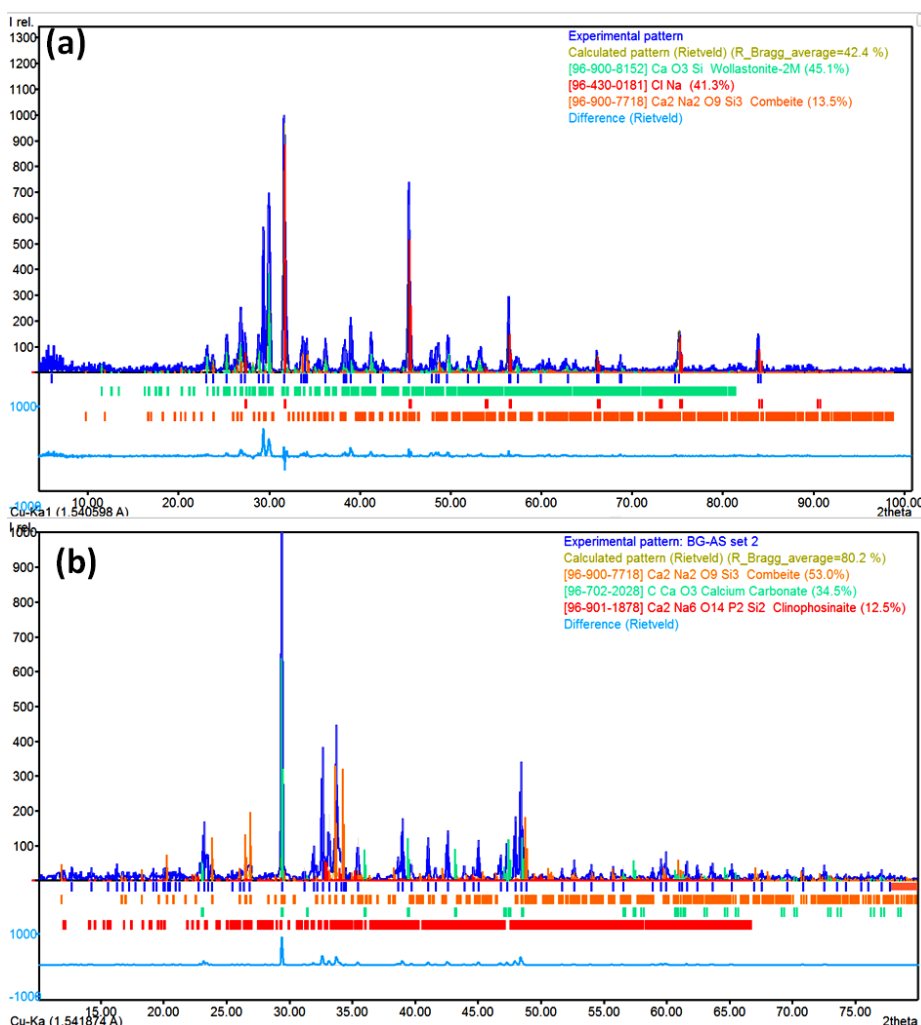

Fig.S1. XRD patterns fitted with similar crystal phases from ICDDdatabase and the Rietveld difference for (a) BG-HCl and (b) BG-HNO<sub>3</sub>

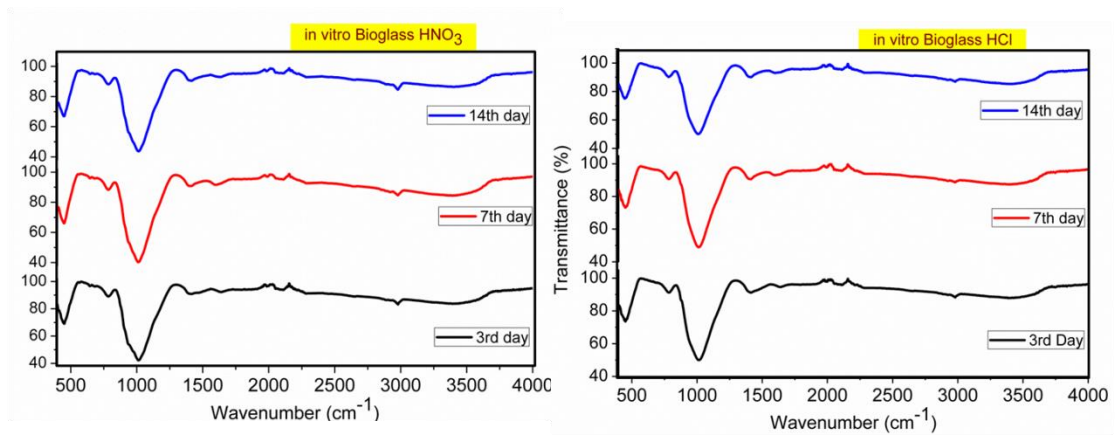

Fig. S2. FTIR spectra of Bioactive glass (BG-HCl and BG-HNO<sub>3</sub>) after immersed in SBF for 1 day, 7<sup>th</sup> day and 14<sup>th</sup> day without washing with water.
